# Supplementary material
Source: PubMed Central journal article supplement (PMC1544144)

A)

50% Matrigel

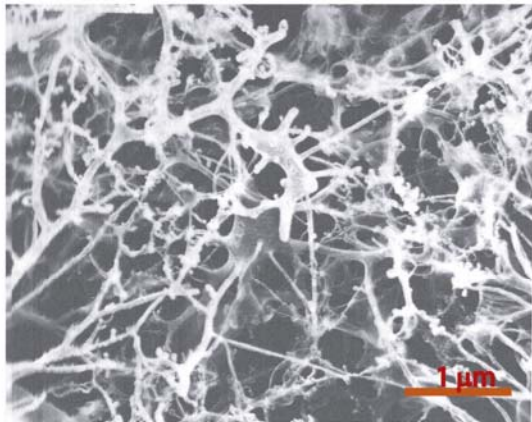

B)

60% Matrigel

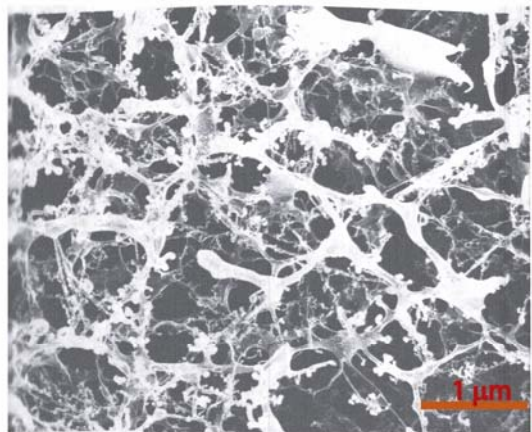

C)

75% Matrigel

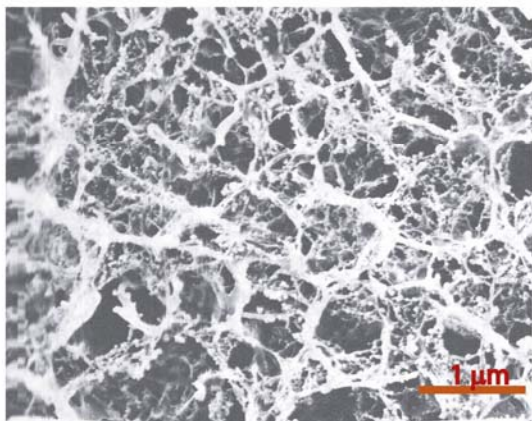

Supplement: pnas_0604460103_1.pdf [file pnas_0604460103_1.pdf]

No 4B4

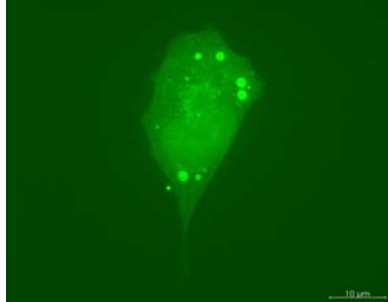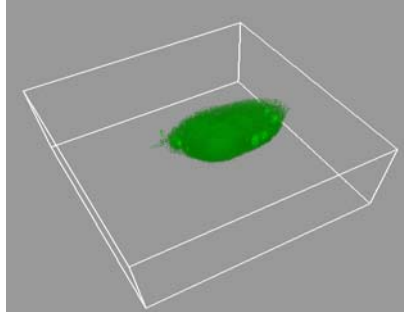

1.25ug/ml  
4B4

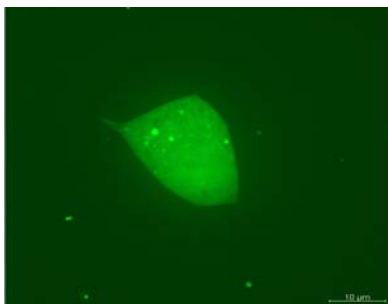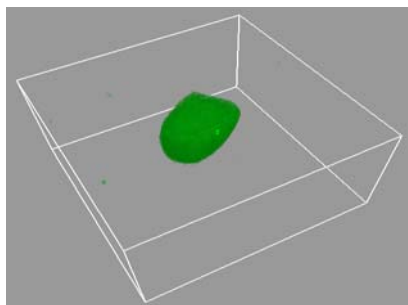

2.5 ug/ml  
4B4

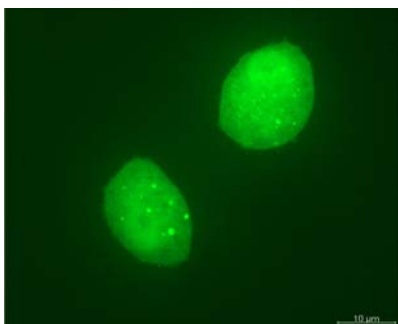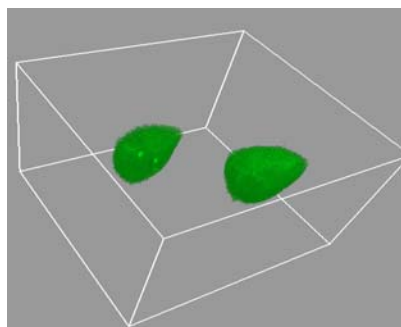

5ug/ml  
4B4

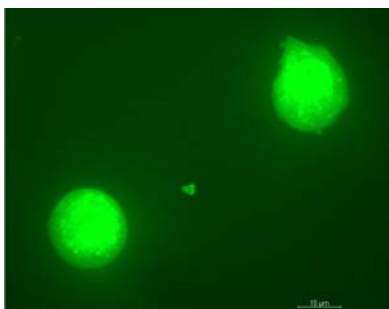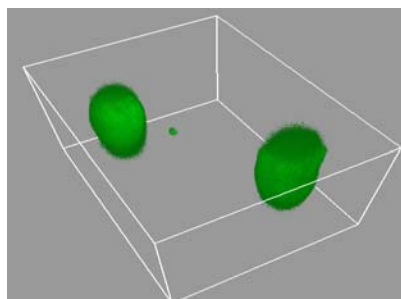

Supplement: pnas_0604460103_2.pdf [file pnas_0604460103_2.pdf]

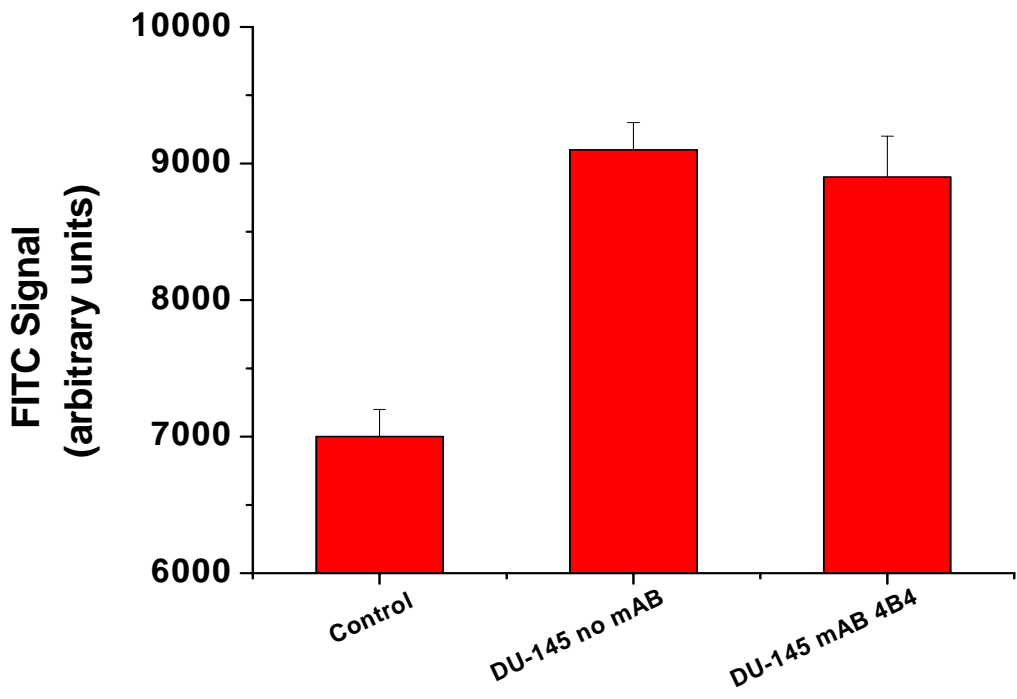

Supplement: pnas_0604460103_3.pdf [file pnas_0604460103_3.pdf]

A)

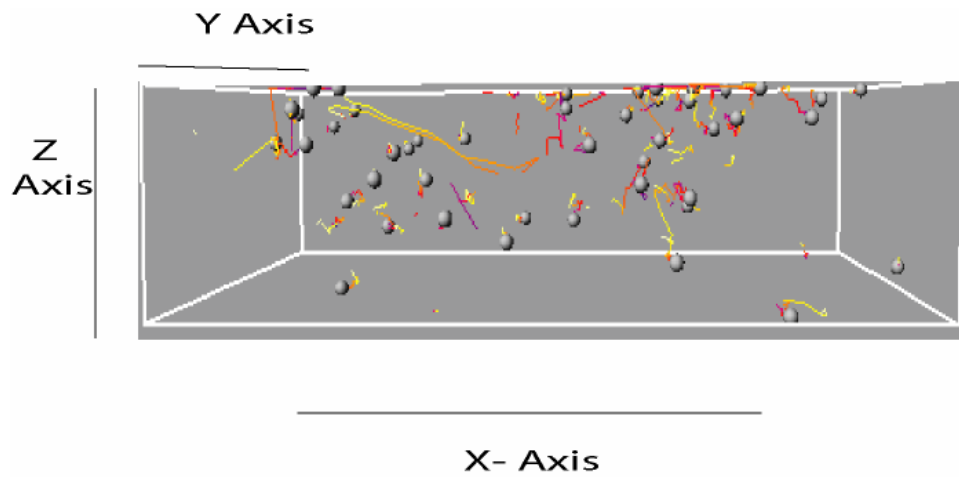

B)

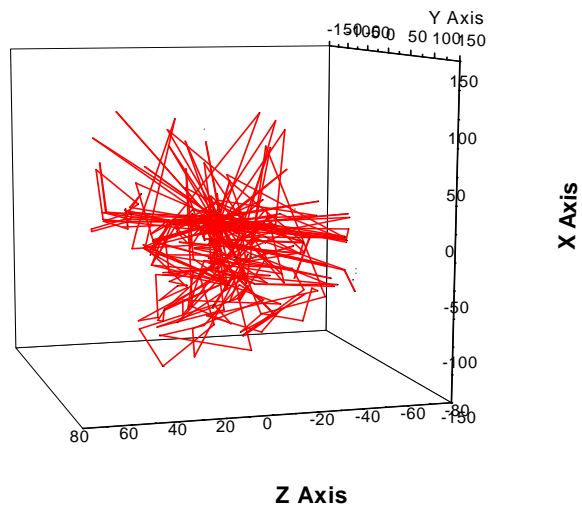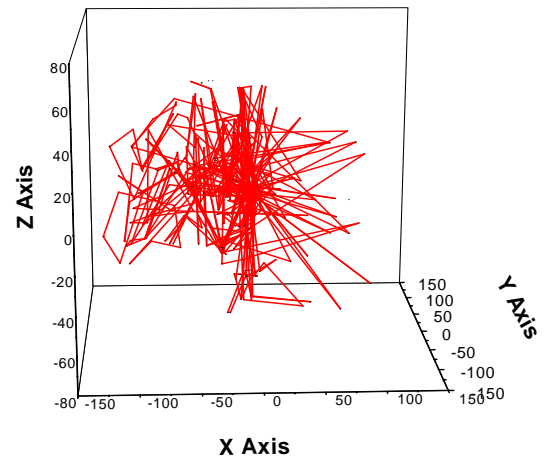

Supplement: pnas_0604460103_4.pdf [file pnas_0604460103_4.pdf]
